# Supplementary material
Source: PubMed Central journal article supplement (PMC8486761)
Supplement: 41422_2021_557_MOESM3_ESM.pdf [file 41422_2021_557_MOESM3_ESM.pdf]

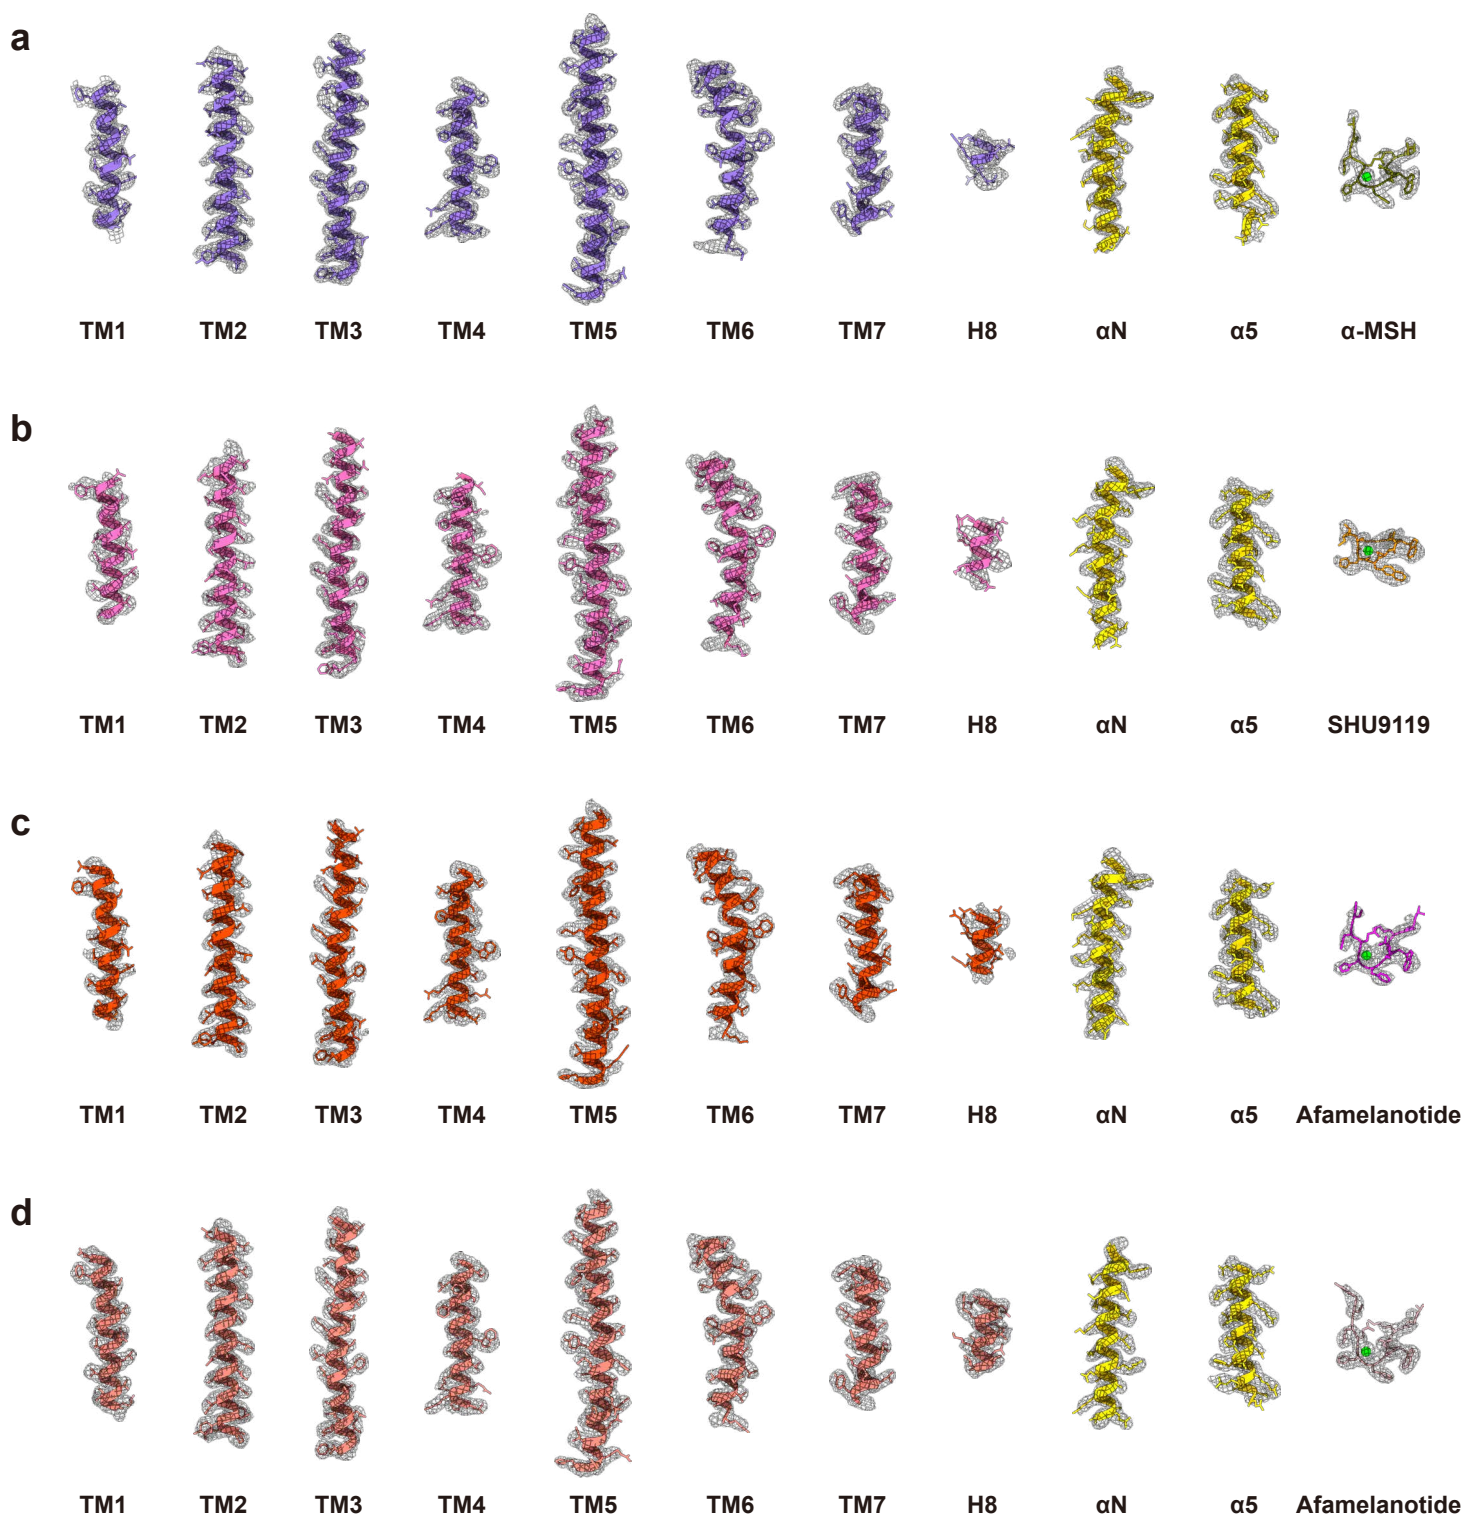

**Fig. S3 Atomic resolution models of the MC1R-Gs complexes.** EM density maps and models of the  $\alpha$ -MSH-MC1R-Gs complex (a), SHU9119-MC1R-Gs complex (b), afamelanotide-MC1R-Gs-Nb35-scFv16 complex (c), and afamelanotide-MC1R-Gs-scFv16 complex (d). All transmembrane helices of MC1R,  $\alpha$ 5 helix and  $\alpha$ N helix of Gs subunit,  $\alpha$ -MSH, SHU9119, afamelanotide and calcium ion are shown. The EM densities are shown at 0.05 threshold.
