# Supplementary material
Source: PubMed Central journal article supplement (PMC8486761)
Supplement: 41422_2021_557_MOESM6_ESM.pdf [file 41422_2021_557_MOESM6_ESM.pdf]

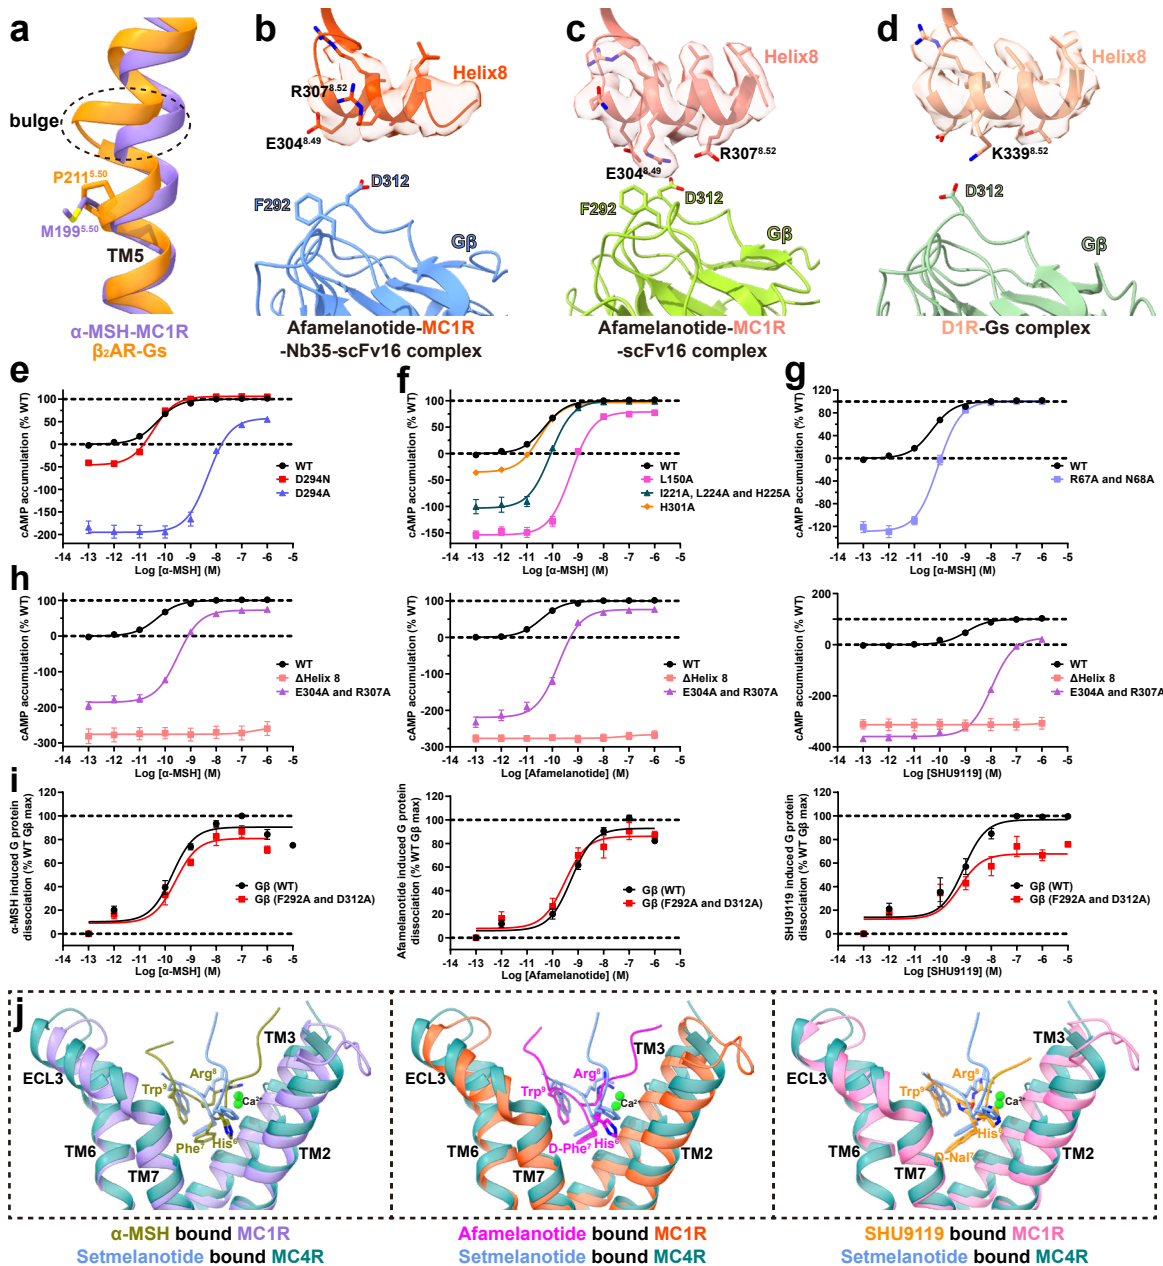

**Fig. S6 The mechanism of MC1R activation and Gs coupling.** **a** Structural comparison between M<sup>5.50</sup> of MC1R (medium purple) and P<sup>5.50</sup> of  $\beta_2$ AR (PDB: 3SN6, dark orange). The bulge of TM5 is not observed in MC1R. The alignment was based on the structures of MC1R and  $\beta_2$ AR. **b-d** The interactions between helix 8 and G $\beta$  in the afamelanotide-MC1R-Gs-Nb35-scFv16 complex (**b**), afamelanotide-MC1R-Gs-scFv16 complex (**c**) and D1R-Gs complex (**d**, PDB: 7JVP). The EM densities of helix 8 of MC1R and D1R are shown. **e-g** Dose-response curves of cAMP accumulation of the WT and mutated MC1Rs stimulated by  $\alpha$ -MSH. Data are presented as means  $\pm$  S.E.M. of three independent experiments performed in quadruplicate. **h** Dose-response curves of cAMP accumulation of WT MC1R and MC1R with mutations in helix 8 stimulated by  $\alpha$ -MSH, afamelanotide and SHU9119. Data are presented as means  $\pm$  S.E.M. of three independent experiments performed in quadruplicate. **i**  $\alpha$ -MSH, afamelanotide and SHU9119 induced G protein activation of WT G $\beta$  and G $\beta$  with mutations in the corresponding residues using NanoBiT assay. Data are presented as means  $\pm$  S.E.M. of three independent experiments performed in quadruplicate. **j** Structural comparison of the orthosteric binding pockets among  $\alpha$ -MSH bound MC1R complex, afamelanotide bound MC1R complex, SHU9119 bound MC1R complex and setmelanotide bound MC4R complex (PDB: 7AUE). The alignment was based on the structures of MC1R and MC4R.
