# Supplementary material
Source: PubMed Central journal article supplement (PMC8486761)
Supplement: 41422_2021_557_MOESM8_ESM.pdf [file 41422_2021_557_MOESM8_ESM.pdf]

**Table S1 Cryo-EM data collection, model refinement and validation statistics.**

| <b>MC1R-Gs complexes</b>                            | <b><math>\alpha</math>-MSH-<br/>MC1R-Gs-<br/>Nb35</b> | <b>Afamelanotide-<br/>MC1R-Gs-<br/>scFv16</b> | <b>Afamelanotide-<br/>MC1R-Gs-<br/>Nb35-scFv16</b> | <b>SHU9119-<br/>MC1R-Gs-<br/>Nb35</b> |
|-----------------------------------------------------|-------------------------------------------------------|-----------------------------------------------|----------------------------------------------------|---------------------------------------|
| <b>Data collection and processing</b>               |                                                       |                                               |                                                    |                                       |
| Magnification                                       | 81,000                                                | 81,000                                        | 81,000                                             | 81,000                                |
| Voltage (kV)                                        | 300                                                   | 300                                           | 300                                                | 300                                   |
| Electron exposure (e <sup>-</sup> /Å <sup>2</sup> ) | 80                                                    | 80                                            | 80                                                 | 70                                    |
| Defocus range (μm)                                  | -0.5 to -3.0                                          | -0.5 to -3.0                                  | -0.5 to -3.0                                       | -0.5 to -3.0                          |
| Pixel size (Å)                                      | 1.045                                                 | 1.045                                         | 1.045                                              | 1.071                                 |
| Symmetry imposed                                    | C1                                                    | C1                                            | C1                                                 | C1                                    |
| Initial particle projections (no.)                  | 4,151,805                                             | 3,968,825                                     | 3,968,825                                          | 4,337,394                             |
| Final particle projections (no.)                    | 454,593                                               | 312,962                                       | 460,989                                            | 502,722                               |
| Map resolution (Å)                                  | 3.0                                                   | 2.9                                           | 2.7                                                | 3.1                                   |
| FSC threshold                                       | 0.143                                                 | 0.143                                         | 0.143                                              | 0.143                                 |
| Map resolution range (Å)                            | 2.0-5.0                                               | 2.0-5.0                                       | 2.0-5.0                                            | 2.0-5.0                               |
| <b>Refinement</b>                                   |                                                       |                                               |                                                    |                                       |
| Initial model used (PDB code)                       | PDB: 6W25                                             | PDB: 6W25                                     | PDB: 6W25                                          | PDB: 6W25                             |
| Model resolution (Å)                                | 3.1                                                   | 3.0                                           | 2.9                                                | 3.2                                   |
| FSC threshold                                       | 0.5                                                   | 0.5                                           | 0.5                                                | 0.5                                   |
| Model resolution range (Å)                          | 50-3.0                                                | 50-2.9                                        | 50-2.7                                             | 50-3.1                                |
| Map sharpening <i>B</i> factor (Å <sup>2</sup> )    | -116.20                                               | -80.97                                        | -76.84                                             | -122.70                               |
| <b>Model composition</b>                            |                                                       |                                               |                                                    |                                       |
| Non-hydrogen atoms                                  | 8048                                                  | 8882                                          | 9850                                               | 8032                                  |
| Protein residues                                    | 1030                                                  | 1138                                          | 1265                                               | 1030                                  |
| Lipids                                              | 0                                                     | 0                                             | 0                                                  | 0                                     |
| <b><i>B</i> factors (Å<sup>2</sup>)</b>             |                                                       |                                               |                                                    |                                       |
| Protein                                             | 111.94                                                | 48.91                                         | 89.69                                              | 129.70                                |
| <b>RMSD</b>                                         |                                                       |                                               |                                                    |                                       |
| Bond lengths (Å)                                    | 0.009                                                 | 0.010                                         | 0.010                                              | 0.009                                 |
| Bond angles (°)                                     | 1.066                                                 | 1.100                                         | 1.043                                              | 1.093                                 |
| <b>Validation</b>                                   |                                                       |                                               |                                                    |                                       |
| MolProbity score                                    | 1.40                                                  | 1.50                                          | 1.46                                               | 1.22                                  |
| Clashscore                                          | 3.86                                                  | 4.64                                          | 3.88                                               | 1.69                                  |
| Rotamer outliers (%)                                | 0.00                                                  | 0.00                                          | 0.00                                               | 0.00                                  |
| <b>Ramachandran plot</b>                            |                                                       |                                               |                                                    |                                       |
| Favored (%)                                         | 96.55                                                 | 96.14                                         | 95.89                                              | 95.74                                 |
| Allowed (%)                                         | 3.45                                                  | 3.86                                          | 4.11                                               | 4.26                                  |
| Disallowed (%)                                      | 0.00                                                  | 0.00                                          | 0.00                                               | 0.00                                  |
| <b>PDB accession number</b>                         | 7F4D                                                  | 7F4F                                          | 7F4H                                               | 7F4I                                  |
| <b>EMDB accession number</b>                        | EMD-31448                                             | EMD-31449                                     | EMD-31452                                          | EMD-31453                             |
