# Supplementary material
Source: PubMed Central journal article supplement (PMC8486761)
Supplement: 41422_2021_557_MOESM11_ESM.pdf [file 41422_2021_557_MOESM11_ESM.pdf]

**Table S4 Interactions of SHU9119 with MC1R.**

| SHU9119              | MC1R                 | Interactions              |
|----------------------|----------------------|---------------------------|
| Nle <sup>U1</sup>    | V97 <sup>2.63</sup>  | Hydrophobic interactions  |
|                      | I98 <sup>2.64</sup>  |                           |
|                      | D117 <sup>3.25</sup> |                           |
| Asp <sup>U2</sup>    | E94 <sup>2.60</sup>  | Van der Waals force       |
|                      | I98 <sup>2.64</sup>  |                           |
| His <sup>U3</sup>    | F45 <sup>1.39</sup>  | $\pi$ - $\pi$ interaction |
|                      | T95 <sup>2.61</sup>  | Hydrogen bond             |
|                      | E94 <sup>2.60</sup>  | Hydrophobic interactions  |
|                      | I98 <sup>2.64</sup>  |                           |
|                      | F280 <sup>7.35</sup> |                           |
| L284 <sup>7.39</sup> |                      |                           |
| D-Nal <sup>U4</sup>  | E94 <sup>2.60</sup>  | Hydrogen bond             |
|                      | D121 <sup>3.29</sup> | Hydrophobic interactions  |
|                      | C125 <sup>3.33</sup> |                           |
|                      | M128 <sup>3.36</sup> |                           |
|                      | F257 <sup>6.51</sup> |                           |
| L284 <sup>7.39</sup> |                      |                           |
| Arg <sup>U5</sup>    | D121 <sup>3.29</sup> | Hydrogen bond             |
|                      | I180 <sup>4.61</sup> | Hydrophobic interactions  |
|                      | Y183 <sup>ECL2</sup> |                           |
|                      | F280 <sup>7.35</sup> |                           |
| Trp <sup>U6</sup>    | Y183 <sup>ECL2</sup> | Hydrogen bond             |
|                      | V188 <sup>5.39</sup> | Hydrophobic interactions  |
|                      | L189 <sup>5.40</sup> |                           |
|                      | L192 <sup>5.43</sup> |                           |
|                      | H26 <sup>6.54</sup>  |                           |
|                      | L261 <sup>6.55</sup> |                           |
| I264 <sup>6.58</sup> |                      |                           |
| Lys <sup>U7</sup>    | F280 <sup>7.35</sup> | Hydrophobic interactions  |

Superscripts refer to the Ballesteros-Weinstein numbers and residues within 4 Å
